# Supplementary material
Source: Preprints.org preprint supplement (doi:10.20944/preprints201910.0041.v1)
Supplement: Supplementary file 1 [file supplementary]

**Table S1.** Gene-specific primers used in this study

| Gene name | Primer sequence (5’-3’) |
| --- | --- |
| *GmD27a* | Forward: CCTGGCTTCGCAGAGATTTA |
|  | Reverse: GAGGGTGGTAGCAGTGTCCTTAT |
| *GmD27b* | Forward: TTCTTTGCTTGGTTAGTTGGG |
|  | Reverse: CACGGCTGCTTGAGTGCTG |
| *GmCCD7a* | Forward: AGGAACATGACCCTAAGACCAAC |
|  | Reverse: CCACCCTCCCACATACACAA |
| *GmCCD7b* | Forward: AACAAGTCAACCCGTCACTCTAA |
|  | Reverse: CGGAAAATGGGCCTCTATG |
| *GmCCD8a* | Forward: AGAACAAGAAAATATGTTACCGAGAG |
|  | Reverse: TGCAGAGTGAATAAGACCCCC |
| *GmCCD8b* | Forward: CGCTTCCCTGACCGACAAC |
|  | Reverse: CCATCCTAACAACAAGGTACCCT |
| *GmMAX1a* | Forward: CCGTCTTGATGAGATTGTGGA |
|  | Reverse: AGGTAAAGGAAGTGGTTGCG |
| *GmMAX1b* | Forward: TGCAGCATTTGGTGTTAACTT |
|  | Reverse: TCGTGTCTTGTCTTTCATTCTCTT |
| *GmMAX1c* | Forward: GCTTCCCCCCTTCACCAAA |
|  | Reverse: TGCCTCTCCAATCACATCGG |
| *GmD14a* | Forward: CCCGACCTCTTCTCCAAACTC |
|  | Reverse: AACATCCGCTCCCACCGAC |
| *GmD14b* | Forward: TTTGAGCAGGGAGAAATCGA |
|  | Reverse: GCATAATACAGCAGGGGACG |
| *GmMAX2a* | Forward: TCTTCATTCACGGAACAGCA |
|  | Reverse: TCAATCACATATTCGACGCCT |
| *GmMAX2b* | Forward: GGAGAATGTGAGAACGCAACC |
|  | Reverse: CCGACTTTTATCCAAAGAGAAAGA |
| *GmD53a* | Forward: TCCAACCGCCTCTACCTCC |
|  | Reverse: ATTCTTTGCGTAAACACCCATA |
| *GmD53b* | Forward: TCACTGTCACTTCTGCCACTCC |
|  | Reverse: GCCACGTCCGACCCTCTAT |
| *GmD53c* | Forward: ATGTGAGAAGCCAAGGATCAGG |
|  | Reverse: GGTAGTTTTCAGCAAAGGAGGG |
